1 **Viromes in Marine Ecosystems Reveal Remarkable Invertebrate**  
2 **RNA Virus Diversity**

3

4 **Yu-Yi Zhang<sup>1,2†</sup>, Yicong Chen<sup>1†</sup>, Xiaoman Wei<sup>1,2</sup>, Jie Cui<sup>1,3\*</sup>**

5

6 <sup>1</sup>CAS Key Laboratory of Molecular Virology & Immunology, Institut Pasteur of  
7 Shanghai, Center for Biosafety Mega-Science, Chinese Academy of Sciences, China

8 <sup>2</sup>University of Chinese Academy of Sciences, China

9 <sup>3</sup>Laboatory for Marine Biology and Biotechnology, Pilot National Laboratory for  
10 Marine Science and Technology (Qingdao), China

11

12 † These authors contributed equally to this work.

13 \* Address correspondence to Jie Cui, [jcui@ips.ac.cn](mailto:jcui@ips.ac.cn)

14

15 **Running head:** Ocean invertebrate viromes

16

17 **Abstract**

18 Ocean viromes remain poorly understood and little is known about the ecological  
19 factors driving aquatic RNA virus evolution. In this study, we used a  
20 meta-transcriptomic approach to characterize the viromes of 58 marine invertebrate  
21 species across three seas. This revealed the presence of 315 newly identified RNA  
22 viruses in nine viral families or orders (*Durnavirales*, *Totiviridae*, *Bunyavirales*,  
23 *Hantaviridae*, *Picornavirales*, *Flaviviridae*, *Hepelivirales*, *Solemoviridae* and  
24 *Tombusviridae*), with most of them are sufficiently divergent to the documented  
25 viruses. With special notice that we first time revealed an ocean virus rooting to  
26 mammalian hantaviruses. We also found evidence for possible host sharing and  
27 switch events during virus evolution. In sum, we demonstrated the hidden diversity of  
28 marine invertebrate RNA viruses.

29

30 **Key word:** Ocean, Aquatic invertebrate, RNA virome, Evolution, Host sharing

31 **Introduction**

32 Viruses are ubiquitous and exist in every living species (Koonin, et al. 2006; Zhang, et  
33 al. 2019). They are mainly studied as agents of disease in humans, animals with  
34 biosafety and economical importance. However, pathogenic viruses represent only a  
35 minor proportion of the virosphere (Geoghegan and Holmes 2017; Middelboe and  
36 Brussaard 2017; Zhang, et al. 2018; Salazar, et al. 2019; Zhang, et al. 2019).  
37 Advances in meta-genomics and meta-transcriptomics led to the discovery of an  
38 enormous amount of viruses, most of which are distinct from presently well-defined  
39 pathogenic viruses (Shi, et al. 2016; Shi, Lin, et al. 2018; Chang, Eden, et al. 2020;  
40 Chang, Li, et al. 2020; Pettersson, et al. 2020; Wu, et al. 2020). These findings have  
41 filled important gaps in virus evolution and reflected the fact that RNA viruses with  
42 relatively small genome size could also have huge diversity in genomic elasticity (Qin,  
43 et al. 2014; Zhang, et al. 2018). The International Committee on Taxonomy of Viruses  
44 (ICTV) has announced to add the viruses discovered by metagenomic and  
45 meta-transcriptomic into the formal classification of viruses (Simmonds, et al. 2017).

46

47 Invertebrate organisms are considered as ancient species and represent the majority of  
48 animal biodiversity, especially in the oceans (Lopez, et al. 2019). Marine invertebrates  
49 are important food source for aquatic higher animals and are significant to maintain  
50 the homeostasis of ecosystem. The oceans, which cover 71% of the Earth, are the  
51 most valuable resource for investigating the ecological and geographical diversity of  
52 viruses. However, to date, aquatic viromic studies tended to study phages but already  
53 showed enormous genetic diversity and ecological distributions (Roux, et al. 2016;  
54 Vlok, et al. 2019; Guajardo-Leiva, et al. 2020; Gulino, et al. 2020; Moon, et al. 2020;  
55 Zhang, et al. 2020). Although some studies included aquatic invertebrates (Magbanua,  
56 et al. 2000; Thakur, et al. 2002; Shi, et al. 2016; Rosani, et al. 2019), there is a lack of  
57 systematic study of these animals in a whole.

58

59 To address key questions on the transmission and evolutionary patterns of viruses in  
60 aquatic invertebrates, we conducted an extensive analysis of RNA viromes in more

---

61 than 50 aquatic invertebrates acquired in three different seas. In particular, by  
62 measuring and comparing the composition and structure of the viral community  
63 within different seas, we aimed to understand the virus-host interaction among them.  
64 Such exploration in this study could not only help us to better understand how viruses  
65 spread between oceans and form the virosphere, but also provide a theoretical basis  
66 for the exploitation and utilization of marine resources.

67

## 68 **Results**

### 69 **Characterization of RNA viromes across different seas**

70 Fifty-eight aquatic invertebrate species of 696 individuals were acquired from five  
71 locations in three different seas (the South China Sea, the East China Sea, and the  
72 Yellow Sea). These species represented six classes (*Polychaeta*, *Crustacea*,  
73 *Hexanauplia*, *Bivalvia*, *Gastropoda*, and *Cephalopoda*) of three phyla (*Annelida*,  
74 *Arthropoda* and *Mollusca*) (Table S1). Fifty-eight RNA sequencing libraries were  
75 generated and sequenced to a high depth and assembled *de novo*. In total,  
76 2,242,428,860 paired-end (PE) reads were generated. The library size of species  
77 ranged from 28,501,148 to 64,776,106 PE reads (Fig. 1 and Table S1).

78

79 Using a series of protein sequence similarity-based BLAST searches, 363 RNA viral  
80 (or partial) genomes were identified, 117 of which contained RNA-dependent RNA  
81 polymerase (RdRp) regions. Previous studies showed endogenous viral elements  
82 (EVEs) existed in the meta-transcriptome generated sequences (Shi, et al. 2016). It is  
83 unlikely that the viruses in this study acted as endogenized forms, as they showed  
84 limited similarity to animal genome sequences and contained opening reading frames  
85 (ORFs) without any premature stop codon. A similarity comparison of RdRp region  
86 indicated that 106 viruses were novel and distinct to publicly available viruses in  
87 Genbank. Ninety-seven fell within known viral families or orders, including  
88 double-stranded RNA viruses (*Durnavirales* and *Totiviridae*) (Fig. 2), negative-sense  
89 single-stranded RNA viruses (*Bunyavirales* and *Hantaviridae*) (Fig. 3), and  
90 positive-sense single-stranded RNA viruses (*Picornavirales*, *Flaviviridae*,

---

91 *Hepelivirales*, *Solemoviridae* and *Tombusviridae*) (Fig. 4). In addition, for the absence  
92 of RdRp conserved domain, 246 aquatic invertebrate viruses identified here were  
93 unable to be classified. The viruses identified in each species ranged from 1 to 26  
94 (East China Sea), 1–16 (South China Sea), and 1–13 (Yellow Sea). The number of  
95 viruses identified was uneven across different water areas in different species (Fig.  
96 1A). There were multiple groups of viruses common to all three seas, including  
97 *Sobelivirales*, *Bunyavirales*, *Durnavirales*, and *Picornavirales*, which comprised  
98 more than half of the viruses discovered in our study (Fig. 1B). And *Tolivirales* were  
99 discovered both in South China Sea and East China Sea, while *Ghabrivirales* and  
100 *Amarillovirales* were discovered in South China Sea and Yellow Sea. Viruses were  
101 heterogeneous in different seas, as each sea harbored unique viruses. However, as the  
102 viral abundance in different seas much relied on their host distribution, such that  
103 description above should be treated with caution.

104

#### 105 **Characterization of double-strand RNA viruses**

106 Thirty dsRNA virus genomes were characterized that belonged to one virus order and  
107 virus family (Fig. 2, S1 and S2).

108

109 Twenty-five viruses were classified into *Durnavirales* (Fig. 2 and S1). Phylogenetic  
110 analysis revealed that Bivalvia Durna-like virus H2 was closely related to Dralkin  
111 virus (Wille, et al. 2020), a penguin virus in a clade related to vertebrate-specific  
112 genogroup 1, indicating that it was a possible potential zoonotic pathogen. Twelve  
113 viruses clustered strongly in the supposedly invertebrate-specific genogroup 3.  
114 Importantly, among these viruses, thirteen viruses, namely, Bivalvia Durna-like  
115 viruses D1, H7, D7, H5, D2, D14, N4, H1, D16, N3, H8, D15, and Beihai  
116 picobirna-like virus 10, formed a close monophyletic group with high amino acid  
117 similarity and short branch lengths indicating possible host sharing across different  
118 seas. In addition, Bivalvia Durna-like viruses D11 and D5 and Gastropoda Durna-like  
119 virus D2 were distantly related to *Picobirnaviridae*, showing that they were  
120 unclassified picobirna-like viruses. Cephalopoda Durna-like virus H2 fell outside of

---

121 well-defined viruses from *Partitiviridae* and clustered with other unclassified  
122 partiti-like viruses, indicating that it belonged to the unclassified partiti-like viruses.  
123 The capsid-encoded segment was not identified in Cephalopoda Durna-like virus H2.  
124 Although, members of the family *Partitiviridae* were believed to contain two genomic  
125 segments (Vainio, et al. 2018).

126

127 Five Toti-like viruses were characterized in *Crustacea* and *Bivalvia* from the South  
128 China Sea and *Crustacea* from the Yellow Sea (Fig. 2 and S2). These viruses showed  
129 limited sequence similarity with the recognized totiviruses. Their genome size ranged  
130 from 1 kb to 8 kb, which was dissimilar to the typical virus genome length (4.6–7.0  
131 kb) in *Totiviridae* (Fig. 5). Phylogenetic analysis revealed that *Bivalvia* Ghabri-like  
132 virus N1 from South China Sea clustered with *Crustacea* Ghabri-like virus H3 from  
133 the Yellow Sea, which indicated possible host sharing between different seas during  
134 evolution. Host sharing was also observed within the same sea, as *Crustacea*  
135 Ghabri-like virus N1 found in *Charybdis feriata* and *Crustacea* Ghabri-like virus N2  
136 found in *Scylla olivacea* clustered together and shared high similarity.

137

### 138 **Characterization of negative-sense RNA viruses**

139 Nine ssRNA(-) viruses were identified within 6 of the 58 libraries present in this study  
140 (Fig. 3 and S3-S5). Three viruses in *Bivalvia* acquired from the Yellow Sea and South  
141 China Sea were closed related to *Hantaviridae*, a family of segmented RNA viruses  
142 (Fig. 2 and S3) (Laenen, et al. 2019). However, the viruses here only contained single  
143 L segments (Fig. 5) containing RdRp regions. Phylogenetic analysis revealed that  
144 these viruses fell out of the *Hantaviridae* cluster. However, a BLAST similarity  
145 search indicated that *Bivalvia* Bunya-like virus H1 and *Bivalvia* Bunya-like virus N2  
146 showed low similarity (25% and 28%, respectively) to Wenling minipizza batfish  
147 hantavirus (*Actinivirus*), whereas *Bivalvia* Bunya-like virus N1 showed low  
148 similarity to Camp Ripley virus (24%). Thus, these viruses were deemed to be novel  
149 distinct hanta-like viruses. It was noteworthy that these viruses showed high similarity  
150 with each other (78%-86%), indicating host sharing between different seas.

151

152 Crustacea Bunya-like virus H1 was characterized and classified as a mypo-like virus,  
153 as this virus fell into the clustered group containing *Mypoviridae* and the best BLAST  
154 hit was Hubei myriapoda virus 5 with 21% protein similarity (Fig. 2 and S4). Bivalvia  
155 Bunya-like virus N3 in *Bunyavirales* was not able to be classified into family, as this  
156 virus showed limited similarity to any well-defined family in *Bunyavirales*. Instead, it  
157 was grouped with unclassified *Bunyavirales* including Beihai bunya-like virus 3 and  
158 Wuhan snail virus.

159

160 Crustacea Jingchu-like virus N1 from South China Sea fell within the recently  
161 established *Chuviridae* (Fig. 3 and S5). It exhibited typical chuvirus structure,  
162 encoding glycoprotein protein and containing RdRp and RNA capping domain (Fig.  
163 5). However, the reverse location of RdRp and RNA capping domain also elucidated  
164 the diverse genome structure of chuviruses. It showed 97% nucleotide similarity with  
165 previously identified Beihai hermit crab virus 3, which was acquired in the same sea.  
166 They also formed a well-supported monophyletic group within the mivirus clade,  
167 which was compatible with the idea that these two viruses might have a single origin.

168

#### 169 **Positive-sense RNA viruses**

170 Our study contained genomic evidence for the presence of 61 ssRNA(+) viruses in  
171 *Bivalvia*, *Gastropoda*, *Cephalopoda*, and *Crustacea* across three seas and these  
172 viruses were from three viral families and two orders (Fig. 4 and S6-S11).

173

174 The most well-represented order of viruses discovered in our survey is *Picornavales*  
175 (Fig. 4 and S6-S7). There were 46 viruses from three seas widely distributed in the  
176 *Picornavales* phylogenetic tree and most of these viruses were isolated from South  
177 China Sea and East China Sea (Table S1-S2). The elasticity of their genome structures  
178 illustrated the diversity of *Picornavales* (Fig. 5). Two viruses (Crustacea Picorna-like  
179 virus N14 from South China Sea and Bivalvia Picorna-like virus D23 from East China  
180 Sea) fell into the *Dicistroviridae* clade. Both of them shared high similarity (80% and

---

181 97%, respectively) to their closely related viruses from South China Sea, showing  
182 possible host sharing across or within different seas. Three viruses from East China  
183 Sea fell within *Iflaviridae* cluster. The phylogenetic tree revealed that all of these  
184 viruses were distantly related to other viruses. Seven viruses fell within *Marnaviridae*,  
185 all of which were also distantly related to other viruses. Other viruses did not cluster  
186 with any well-defined family but clustered with other unclassified picorna-like viruses.  
187 These 34 viruses widely distributed in the phylogeny of *Picornavales*. Several  
188 host-sharing events could be characterized involving Bivalvia Picorna-like viruses  
189 H13, N7, H15, N20, H14, N56, and N21, Bivalvia Picorna-like virus N58, and  
190 Wenzhou picorna-like virus 38.

191  
192 Three viruses in *Bivalvia* (Bivalvia Amarillo-like virus N1, Bivalvia Amarillo-like  
193 virus N3, and Bivalvia Amarillo-like virus H1) formed a single cluster that fell within  
194 the *Flaviridae* clade, indicating that they were flaviviruses (Fig. 4 and S8). Compared  
195 with the flaviviruses in invertebrates, they were most closely related to squid  
196 flaviviruses, although they only exhibited 26%–36% similarity to southern pygmy  
197 squid flavivirus. Unexpectedly, DEAD-like helicase C (c138915), which was involved  
198 in ATP-dependent RNA or DNA unwinding and existed in eukaryotic cells and in  
199 many bacteria and Archaea (Linder and Jankowsky 2011), was identified in Bivalvia  
200 Amarillo-like virus N1, lending additional support to the idea that gene exchange  
201 occurs between host and virus.

202  
203 Four viruses from East China Sea were identified as *Hepelivirales* (Fig. 4 and S9).  
204 Phylogenetic analysis revealed that Bivalvia Hepeli-like virus D2 belonged to  
205 *Hepeviridae* and a similarity search showed that it was identical to Barns Ness  
206 breadcrumb sponge hepe-like virus 2, indicating a possible host-switching event  
207 during evolution. Another three viruses (Bivalvia Hepeli-like virus D1 and D3 and  
208 Crustacea Hepeli-like virus D1) showed limited similarity to well-defined classified  
209 viruses. They and other invertebrate hepeli-like viruses formed a cluster related to  
210 *Alphatetraviridae* that was once thought to have a narrow host range (larvae of



---

211 lepidopteran insect species, such as moth and butterfly) and tissue tropism  
212 (Dorrington, et al. 2020).

213

214 Seven viruses across all three seas were related to *Solemoviridae*  
215 (plant/invertebrate-associated) (Fig. 4 and S10). All of these viruses showed limited  
216 similarity to sobemoviruses, which were once thought to be plant specific, with long  
217 branches, probably giving support to the idea that virus may have switched the hosts  
218 on different trophic levels during evolution, as some Bivalvia and Gastropoda fed on  
219 aquatic plants (Harder, et al. 2016; Iturriza-Gomara and O'Brien 2016; Wu, et al.  
220 2020).

221

222 One virus (Bivalvia Toli-like virus D1) only had a partial genome containing the  
223 RdRp region and fell within *Tombusviridae* (Fig. 4-5 and S11). The amino acid  
224 sequence similarity to the most closely related virus species (Sanxia tombus-like virus  
225 5) was 30%. Both viruses are distantly related to viruses from *Calvusvirinae* and  
226 *Procedovirinae*, indicating that Bivalvia Toli-like virus D1 is a tombus-like virus.

227

### 228 **Likelihood of Host-sharing and switching pattern accordance to the ecology**

229 A large number of diverse viruses (including >300 novel species) were discovered in  
230 three different seas (Yellow Sea, South China Sea, and East China Sea). As the  
231 phylogenetic analysis combined with genome comparison indicated, a large amount  
232 of host sharing events occurred between these viruses. For example, 1) the  
233 distribution of Bivalvia Durna-like virus among three ocean areas; 2) similar  
234 Bunya-like viruses shared by the South China Sea and the Yellow Sea; and 3) the  
235 sharing of Picorna-like virus in different hosts, as we described above. However, these  
236 viruses only comprised a tiny portion of these viruses found in these marine areas.

237

238 In order to gain a more complete view of patterns in RNA virus evolution in these  
239 areas, we built a dataset comprised of RNA viruses identified in these seas and in two  
240 more distinct areas, freshwater and terrestrial, with certain hosts. Finally, 2671 RNA

---

241 viruses with certain hosts were added into the dataset. Network analysis indicated that  
242 there was an enormous number of host-sharing events occurring across different  
243 habitats during evolution (Fig. 6A) and number of viruses had a positive correlation  
244 with host-sharing frequency (Fig. 6B). It was noteworthy that the filtration of viruses  
245 across different seas carried by a variety of hosts.

246

## 247 **Discussion**

248 In this study, we performed viromics to investigate the virus community in aquatic  
249 invertebrates across three different seas. Analysis of the meta-transcriptomes of 58  
250 aquatic species led to the discovery of the capacity of aquatic invertebrates to carry  
251 widely unknown viruses, in particular a total of 315 novel RNA viruses were  
252 characterized (Table S2). More than half of the newly identified RNA viruses showed  
253 20%–50% similarity to their most closely related viruses, indicating the hidden  
254 genetic diversity of marine viruses. We were able to identify multiple domains (e.g.,  
255 DEAD-like helicase C) that have not been previously observed in specific viral  
256 families. This revealed that the genome structures of marine viruses could be elastic  
257 (Fig. S12) and diverse than previously thought. However, the biological function of  
258 such domains still needs to be experimentally confirmed. As virus identification  
259 mostly depended on similarity-based searching, there may have been a failure to  
260 discover extremely divergent viruses (Zhang, et al. 2018). Hence, further research  
261 using more advanced viral identification methods/pipelines and metagenomic  
262 technology is merited.

263

264 Viruses were characterized in all marine invertebrate samples from this study and no  
265 visible lesions or illness were observed in any of the samples we acquired. This  
266 provided further evidence for the idea that disease-causing viruses are probably the  
267 exception rather than the rule (Junglen and Drosten 2013; Li, et al. 2015; Marklewitz,  
268 et al. 2015; Webster, et al. 2015). Interestingly, some invertebrate viruses seemed  
269 more ancestral than vertebrate viruses, i.e., rooted in the phylogeny. For example,  
270 Bivalvia Bunya-like virus H1, N1 and N2 were basal to other hantaviruses found in

---

271 vertebrates (Fig. 3 and S3), suggesting a probable marine origin of *Hantaviridae*.  
272 However, large data may be needed to address the true co-divergence of this viral  
273 family.

274

275 Different seas seemingly contained sea-specific virus groups as shown in Fig. 1. This  
276 probably indicated the restrained heterogeneity of viral communities in different seas.  
277 However, no statistical methods were used to determine sample size and distribution.  
278 Thus, this conclusion should be treated with caution and an in-depth study of these  
279 viruses remains necessary. An amount of cross-ocean transmission and host sharing  
280 events were observed in this study (Fig. 6), suggesting evolutionary connectivity of  
281 marine viruses between seas. The possible transmission of viruses across different  
282 seas might involve natural factors such as moving of marine species. More  
283 importantly, we observed some viruses crossing the water–land interface during  
284 evolution, indicating that the ocean is not a boundary for host sharing or host  
285 switching. In sum, we showed the hidden diversity of RNA viruses in marine  
286 invertebrates and revealed the geographical structure of viruses and transmission  
287 dynamic of the viruses in multiple marine environments.

288

## 289 **Materials and Methods**

### 290 **Sample collection and preparation**

291 58 marine invertebrate species (in the phylum of *Arthropoda* and *Mollusca*) were  
292 collected from the seafood markets or from the fishermen in 5 different locations  
293 (Table S1). No statistical methods were used to determine sample size and distribution.  
294 Twelve individuals of each species were collected, then raised in artificial seawater  
295 for 24h if conditions permitted. Tissues of viscera for all the individuals were  
296 dissected and pooled together to increase the virus abundance. Samples were stored in  
297 RNAlater Stabilization Solution (Invitrogen) at room temperature according to the  
298 instruction before transferred to a -80°C freezer.

299

### 300 **Sequence library construction and sequencing**

---

301 To construct each library, samples were homogenized first and total RNA was  
302 extracted using TRIzol Reagent (Invitrogen). rRNA was removed using Ribo-Zero  
303 rRNA Removal Kit (Human/Mouse/Rat) and Ribo-Zero rRNA Removal Kit (Bacteria)  
304 (Illumina). In order to reduce the impact of the host transcriptome on subsequent  
305 analysis, we enriched viral nucleic acid by negative selection targeted RNA with poly  
306 A tails, and then prepare the library using Nextera XT DNA Library Preparation Kit  
307 (Illumina). Paired-end (150bp) sequencing of each library was performed on the  
308 NovaSeq 6000 (Illumina).

309

### 310 **Virus discovery and annotation**

311 For each library, sequencing reads were quality trimmed and then assembled *de novo*  
312 using Trinity program (Haas, et al. 2013) with default settings. The assembled  
313 (consensus) contigs were then screened against the non-redundat protein (nr) database  
314 using Diamond blastx (Buchfink, et al. 2015) with a cut-off e-value of 1E-5. We  
315 excluded the hits which showed similarity to the host, plant, bacterial, and fungal  
316 sequences to reduce potential internal or external contaminants. The remaining viral  
317 hits were further filtered to remove viruses with host of plant, bacteria and fungi as  
318 described previously (Wille, et al. 2019). All the sequences were searched for the  
319 RdRp region with a RdRp dataset collected from NCBI refseq database (Table S2). A  
320 virus was considered novel if the RdRp region showed < 90% amino acid similarity to  
321 any previously identified virus (Shi, et al. 2016; Chang, Eden, et al. 2020). All the  
322 sequence data could be accessed from National Genomics Data Center  
323 (<https://bigd.big.ac.cn/>) with BioProject Accession PRJCA003705 (also see Table S2)  
324 and should be used with judgement. To study the genome structure, we predicted the  
325 open reading frames (ORF) with the website of ORF finder provided by NCBI  
326 (<https://www.ncbi.nlm.nih.gov/orffinder>), and performed domain-based search with  
327 NCBI conserved domain database (CDD) (Lu, et al. 2020) with an expect value  
328 threshold of 0.01.

329

### 330 **Confirmation of viral contigs**

---

331 Viral contigs were confirmed by RT-PCR method with multiple primers (Table S4)  
332 designed according to the assembled sequences. Amplification products were  
333 identified by Sanger sequencing and by aligning to the raw contigs (identity > 95%).

334

### 335 **Host species confirmation**

336 The cytochrome c oxidase subunit I (COI) gene was amplified by PCR method with  
337 the primers LCO1490 and HCO2198 reported before (Folmer, et al. 1994), and then  
338 sequenced by Sanger sequencing. They were subsequently compared against the nr  
339 database to confirm the host species (identity > 90%). For those specimens that failed  
340 PCR experiment due to low specificity of general primers, we used COI protein  
341 sequence from related host (download from NCBI refseq database) as a bait to obtain  
342 the sequences from the assembled contigs with tblastn. However, in some samples,  
343 the COI sequences showed low identity to sequences from other species. This  
344 probably suggested possible high diversity within the species or the misclassification  
345 at the species level as mentioned previously (Metzger, et al. 2018).

346

### 347 **Phylogenetic analysis**

348 To inferring the evolutionary history of all RNA viruses identified in this study,  
349 sequences of viruses identified here, combining with protein sequences obtained from  
350 GenBank using the top search results from BLAST (Altschul, et al. 1990), and  
351 representative viruses in ICTV were collected. Then, the RdRp protein sequences of  
352 these viruses were respectively aligned in accordance to their classified orders or  
353 families using MAFFT 7.271 (Katoh and Standley 2013). In order to reduce the  
354 alignment uncertainty, regions that aligned poorly were removed using TrimAL  
355 (Capella-Gutiérrez, et al. 2009) with the default setting and confirmed manually using  
356 MEGA X (Kumar, et al. 2018). the sequence was excluded if its length was less than  
357 1/3 of the alignment. In total, 97 of 117 viruses were included in phylogenetic  
358 analysis. The best-fit model for each alignment was selected and maximum likelihood  
359 (ML) phylogenetic trees were constructed using IQ-Tree 1.6.12 (Nguyen, et al. 2015),  
360 incorporating 1000 replicates of SH-like approximate likelihood ratio test (SH-aLRT)

---

361 to assess node robustness. Phylogenetic trees were viewed and annotated in FigTree  
362 V1.4.3 (<https://github.com/rambaut/figtree/>).

363

### 364 **Host sharing event characterization**

365 To determine the potential host sharing events, all the reported publicly available  
366 viruses with certain host from five specific area (South China Sea, East China Sea,  
367 Yellow Sea, freshwater and terrestrial) were collected into the dataset. The dataset  
368 comprised of 2607 RNA viruses with certain hosts (Table S3). Nucleotide sequences  
369 were first aligned with MAFFT 7.271 (Kato and Standley 2013) and manually  
370 confirmed. Comparison of genetic diversity between the different viruses was  
371 undertaken by computing the number of base differences per site averaged over all  
372 sequence pairs between pairwise viruses using MEGA X (Kumar, et al. 2018).  
373 Pairwise viruses from different areas with a distance less than 0.2 as one host sharing  
374 event (Wille, et al. 2019; Mahar, et al. 2020; Wille, et al. 2020) and the host sharing  
375 network was drawn with Cytoscape 3.8.1 (Shannon, et al. 2003).

376

### 377 **Compliance and ethics**

378 The authors declare that they have no conflict of interest.

379

### 380 **Acknowledgments**

381 This work was supported by National Natural Science Foundation of China  
382 (31970176), Collaborative Research Grant (KLMVI-OP-202002) of CAS Key  
383 Laboratory of Molecular Virology & Immunology, Institut Pasteur of Shanghai,  
384 Chinese Academy of Sciences, Guangdong Provincial Key Laboratory of Fishery  
385 Ecology and Environment (FEEL-2019-6), and CAS Pioneer Hundred Talents  
386 Program.

387

### 388 **References**

389 Altschul SF, Gish W, Miller W, Myers EW, Lipman DJ. 1990. Basic local alignment  
390 search tool. *J Mol Biol* 215:403-410.

- 
- 391 Buchfink B, Xie C, Huson DH. 2015. Fast and sensitive protein alignment using  
392 DIAMOND. *Nat Methods* 12:59-60.
- 393 Capella-Gutiérrez S, Silla-Martínez JM, Gabaldón T. 2009. trimAl: a tool for  
394 automated alignment trimming in large-scale phylogenetic analyses. *Bioinformatics*  
395 25:1972-1973.
- 396 Chang WS, Eden JS, Hall J, Shi M, Rose K, Holmes EC. 2020. Metatranscriptomic  
397 Analysis of Virus Diversity in Urban Wild Birds with Paretic Disease. *J Virol* 94.
- 398 Chang WS, Li CX, Hall J, Eden JS, Hyndman TH, Holmes EC, Rose K. 2020.  
399 Meta-Transcriptomic Discovery of a Divergent Circovirus and a Chaphamaparvovirus  
400 in Captive Reptiles with Proliferative Respiratory Syndrome. *Viruses* 12.
- 401 Dorrington RA, Jiwaji M, Awando JA, Bruyn MM. 2020. Advances in Tetravirus  
402 Research: New Insight Into the Infectious Virus Lifecycle and an Expanding Host  
403 Range. *Curr Issues Mol Biol* 34:145-162.
- 404 Folmer O, Black M, Hoeh W, Lutz R, Vrijenhoek R. 1994. DNA primers for  
405 amplification of mitochondrial cytochrome c oxidase subunit I from diverse metazoan  
406 invertebrates. *Mol Mar Biol Biotechnol* 3:294-299.
- 407 Geoghegan JL, Holmes EC. 2017. Predicting virus emergence amid evolutionary  
408 noise. *Open Biol* 7.
- 409 Guajardo-Leiva S, Chnaiderman J, Gaggero A, Díez B. 2020. Metagenomic Insights  
410 into the Sewage RNA Viroisphere of a Large City. *Viruses* 12.
- 411 Gulino K, Rahman J, Badri M, Morton J, Bonneau R, Ghedin E. 2020. Initial  
412 Mapping of the New York City Wastewater Virome. *mSystems* 5.
- 413 Haas BJ, Papanicolaou A, Yassour M, Grabherr M, Blood PD, Bowden J, Couger MB,  
414 Eccles D, Li B, Lieber M, et al. 2013. De novo transcript sequence reconstruction  
415 from RNA-seq using the Trinity platform for reference generation and analysis. *Nat*  
416 *Protoc* 8:1494-1512.
- 417 Harder TC, Buda S, Hengel H, Beer M, Mettenleiter TC. 2016. Poultry food  
418 products--a source of avian influenza virus transmission to humans? *Clin Microbiol*  
419 *Infect* 22:141-146.
- 420 Iturriza-Gomara M, O'Brien SJ. 2016. Foodborne viral infections. *Curr Opin Infect*

---

421 Dis 29:495-501.

422 Junglen S, Drosten C. 2013. Virus discovery and recent insights into virus diversity in  
423 arthropods. *Curr Opin Microbiol* 16:507-513.

424 Katoh K, Standley DM. 2013. MAFFT multiple sequence alignment software version  
425 7: improvements in performance and usability. *Mol Biol Evol* 30:772-780.

426 Koonin EV, Senkevich TG, Dolja VV. 2006. The ancient Virus World and evolution of  
427 cells. *Biol Direct* 1:29.

428 Kumar S, Stecher G, Li M, Knyaz C, Tamura K. 2018. MEGA X: Molecular  
429 Evolutionary Genetics Analysis across Computing Platforms. *Mol Biol Evol*  
430 35:1547-1549.

431 Laenen L, Vergote V, Calisher CH, Klempa B, Klingström J, Kuhn JH, Maes P. 2019.  
432 Hantaviridae: Current Classification and Future Perspectives. *Viruses* 11.

433 Li CX, Shi M, Tian JH, Lin XD, Kang YJ, Chen LJ, Qin XC, Xu J, Holmes EC,  
434 Zhang YZ. 2015. Unprecedented genomic diversity of RNA viruses in arthropods  
435 reveals the ancestry of negative-sense RNA viruses. *Elife* 4.

436 Linder P, Jankowsky E. 2011. From unwinding to clamping - the DEAD box RNA  
437 helicase family. *Nat Rev Mol Cell Biol* 12:505-516.

438 Lopez JV, Kamel B, Medina M, Collins T, Baums IB. 2019. Multiple Facets of  
439 Marine Invertebrate Conservation Genomics. *Annu Rev Anim Biosci* 7:473-497.

440 Lu S, Wang J, Chitsaz F, Derbyshire MK, Geer RC, Gonzales NR, Gwadz M, Hurwitz  
441 DI, Marchler GH, Song JS, et al. 2020. CDD/SPARCLE: the conserved domain  
442 database in 2020. *Nucleic Acids Res* 48:D265-d268.

443 Magbanua FO, Natividad KT, Migo VP, Alfafara CG, de la Pena FO, Miranda RO,  
444 Albaladejo JD, Nadala EC, Jr., Loh PC, Mahilum-Tapay L. 2000. White spot  
445 syndrome virus (WSSV) in cultured *Penaeus monodon* in the Philippines. *Dis Aquat*  
446 *Organ* 42:77-82.

447 Mahar JE, Shi M, Hall RN, Strive T, Holmes EC. 2020. Comparative Analysis of  
448 RNA Virome Composition in Rabbits and Associated Ectoparasites. *J Virol* 94.

449 Marklewitz M, Zirkel F, Kurth A, Drosten C, Junglen S. 2015. Evolutionary and  
450 phenotypic analysis of live virus isolates suggests arthropod origin of a pathogenic



---

451 RNA virus family. *Proc Natl Acad Sci U S A* 112:7536-7541.

452 Metzger MJ, Paynter AN, Siddall ME, Goff SP. 2018. Horizontal transfer of  
453 retrotransposons between bivalves and other aquatic species of multiple phyla. *Proc*  
454 *Natl Acad Sci U S A* 115:E4227-e4235.

455 Middelboe M, Brussaard CPD. 2017. Marine Viruses: Key Players in Marine  
456 Ecosystems. *Viruses* 9.

457 Moon K, Jeon JH, Kang I, Park KS, Lee K, Cha CJ, Lee SH, Cho JC. 2020.  
458 Freshwater viral metagenome reveals novel and functional phage-borne antibiotic  
459 resistance genes. *Microbiome* 8:75.

460 Nguyen LT, Schmidt HA, von Haeseler A, Minh BQ. 2015. IQ-TREE: a fast and  
461 effective stochastic algorithm for estimating maximum-likelihood phylogenies. *Mol*  
462 *Biol Evol* 32:268-274.

463 Pettersson JH, Ellström P, Ling J, Nilsson I, Bergström S, González-Acuña D, Olsen  
464 B, Holmes EC. 2020. Circumpolar diversification of the *Ixodes uriae* tick virome.  
465 *PLoS Pathog* 16:e1008759.

466 Qin XC, Shi M, Tian JH, Lin XD, Gao DY, He JR, Wang JB, Li CX, Kang YJ, Yu B,  
467 et al. 2014. A tick-borne segmented RNA virus contains genome segments derived  
468 from unsegmented viral ancestors. *Proc Natl Acad Sci U S A* 111:6744-6749.

469 Rosani U, Shapiro M, Venier P, Allam B. 2019. A Needle in A Haystack: Tracing  
470 Bivalve-Associated Viruses in High-Throughput Transcriptomic Data. *Viruses* 11.

471 Roux S, Brum JR, Dutilh BE, Sunagawa S, Duhaime MB, Loy A, Poulos BT,  
472 Solonenko N, Lara E, Poulain J, et al. 2016. Ecogenomics and potential  
473 biogeochemical impacts of globally abundant ocean viruses. *Nature* 537:689-693.

474 Salazar G, Paoli L, Alberti A, Huerta-Cepas J, Ruscheweyh HJ, Cuenca M, Field CM,  
475 Coelho LP, Cruaud C, Engelen S, et al. 2019. Gene Expression Changes and  
476 Community Turnover Differentially Shape the Global Ocean Metatranscriptome. *Cell*  
477 179:1068-1083 e1021.

478 Shannon P, Markiel A, Ozier O, Baliga NS, Wang JT, Ramage D, Amin N,  
479 Schwikowski B, Ideker T. 2003. Cytoscape: a software environment for integrated  
480 models of biomolecular interaction networks. *Genome Res* 13:2498-2504.

---

481 Shi M, Lin XD, Chen X, Tian JH, Chen LJ, Li K, Wang W, Eden JS, Shen JJ, Liu L,  
482 et al. 2018. The evolutionary history of vertebrate RNA viruses. *Nature* 556:197-202.

483 Shi M, Lin XD, Tian JH, Chen LJ, Chen X, Li CX, Qin XC, Li J, Cao JP, Eden JS, et  
484 al. 2016. Redefining the invertebrate RNA virosphere. *Nature* 540:539-543.

485 Shi M, Zhang YZ, Holmes EC. 2018. Meta-transcriptomics and the evolutionary  
486 biology of RNA viruses. *Virus Res* 243:83-90.

487 Simmonds P, Adams MJ, Benkő M, Breitbart M, Brister JR, Carstens EB, Davison AJ,  
488 Delwart E, Gorbalenya AE, Harrach B, et al. 2017. Consensus statement: Virus  
489 taxonomy in the age of metagenomics. *Nat Rev Microbiol* 15:161-168.

490 Thakur PC, Corsin F, Turnbull JF, Shankar KM, Hao NV, Padiyar PA, Madhusudhan  
491 M, Morgan KL, Mohan CV. 2002. Estimation of prevalence of white spot syndrome  
492 virus (WSSV) by polymerase chain reaction in *Penaeus monodon* postlarvae at time  
493 of stocking in shrimp farms of Karnataka, India: a population-based study. *Dis Aquat*  
494 *Organ* 49:235-243.

495 Vainio EJ, Chiba S, Ghabrial SA, Maiss E, Roossinck M, Sabanadzovic S, Suzuki N,  
496 Xie J, Nibert M, Ictv Report C. 2018. ICTV Virus Taxonomy Profile: Partitiviridae. *J*  
497 *Gen Virol* 99:17-18.

498 Vlok M, Gibbs AJ, Suttle CA. 2019. Metagenomes of a Freshwater Charavirus from  
499 British Columbia Provide a Window into Ancient Lineages of Viruses. *Viruses* 11.

500 Webster CL, Waldron FM, Robertson S, Crowson D, Ferrari G, Quintana JF, Brouqui  
501 JM, Bayne EH, Longdon B, Buck AH, et al. 2015. The Discovery, Distribution, and  
502 Evolution of Viruses Associated with *Drosophila melanogaster*. *PLoS Biol*  
503 13:e1002210.

504 Wille M, Harvey E, Shi M, Gonzalez-Acuña D, Holmes EC, Hurt AC. 2020.  
505 Sustained RNA virome diversity in Antarctic penguins and their ticks. *ISME J*  
506 14:1768-1782.

507 Wille M, Shi M, Klaassen M, Hurt AC, Holmes EC. 2019. Virome heterogeneity and  
508 connectivity in waterfowl and shorebird communities. *ISME J* 13:2603-2616.

509 Wu H, Pang R, Cheng T, Xue L, Zeng H, Lei T, Chen M, Wu S, Ding Y, Zhang J, et al.  
510 2020. Abundant and Diverse RNA Viruses in Insects Revealed by RNA-Seq Analysis:

---

511 Ecological and Evolutionary Implications. *mSystems* 5:e00039-00020.  
512 Zhang Y-Z, Chen Y-M, Wang W, Qin X-C, Holmes EC. 2019. Expanding the RNA  
513 Virosphere by Unbiased Metagenomics. *Annual Review of Virology* 6:119-139.  
514 Zhang YZ, Shi M, Holmes EC. 2018. Using Metagenomics to Characterize an  
515 Expanding Virosphere. *Cell* 172:1168-1172.  
516 Zhang Z, Qin F, Chen F, Chu X, Luo H, Zhang R, Du S, Tian Z, Zhao Y. 2020.  
517 Culturing novel and abundant pelagiphages in the ocean. *Environ Microbiol.*

518

### 519 **Figure legends**

520 **Fig. 1 The overall characterization of virus distribution.** **A)** The distribution and  
521 diversity of virus in invertebrate transcriptomes. The top graph shows the number of  
522 reads in each library. The colors of the bars indicate the location of sample collecting,  
523 Yellow Sea (yellow), East China Sea (red), South China Sea (blue). The full name of  
524 each library is shown on top of each bar, while major host classifications are shown  
525 above the bar graph. The bottom graph shows a summary of classification of virus  
526 species found in this study. **B)** Overlap of RNA viral families in aquatic invertebrates  
527 across different seas. The number of viruses in each order or family is shown in  
528 brackets. Circles are color coded according to the location of sample collecting,  
529 Yellow Sea (yellow), East China Sea (red), South China Sea (blue).

530

531 **Fig. 2 Phylogenetic trees of the dsRNA viruses, including the viruses identified in**  
532 **this study and related representative viruses.** The trees are inferred using amino  
533 acid sequences of the RdRp gene and flanking conserved domain. These trees are  
534 midpoint rooted for clarity only. Viruses identified in this study are denoted with a  
535 filled colored circle based on the areas where their hosts were acquired, Yellow Sea  
536 (yellow), East China Sea (red), South China Sea (blue), while other representative  
537 publicly available viruses are denoted with a grey circle. An asterisk indicates node  
538 SH-aLRT support >70%. The scale bar indicates the number of amino acid changes  
539 per site.

540

---

541 **Fig. 3 Phylogenetic trees of the -ssRNA viruses, including the viruses identified in**  
542 **this study and related representative viruses.** The trees are inferred using amino  
543 acid sequences of the RdRp gene and flanking conserved domain. These trees are  
544 midpoint rooted for clarity only. Viruses identified in this study are denoted with a  
545 filled colored circle based on the area where their hosts were acquired, Yellow Sea  
546 (yellow), East China Sea (red), South China Sea (blue), while other representative  
547 publicly available viruses which are denoted with a grey circle. An asterisk indicates  
548 node SH-aLRT support >70%. The scale bar indicates the number of amino acid  
549 changes per site.

550

551 **Fig. 4 Phylogenetic trees of the +ssRNA viruses, including the viruses identified**  
552 **in this study and related representative viruses.** The trees are inferred using amino  
553 acid sequences of the RdRp gene and flanking conserved domain. These trees are  
554 midpoint rooted for clarity only. Viruses identified in this study are denoted with a  
555 filled colored circle based on the area where their hosts were acquired, Yellow Sea  
556 (yellow), East China Sea (red), South China Sea (blue), while other representative  
557 publicly available viruses are denoted with a grey circle. An asterisk indicates node  
558 SH-aLRT support >70%. The scale bar indicates the number of amino acid changes  
559 per site.

560

561 **Fig. 5 Genome organization of representative viruses within major viral clades.**  
562 The contigs and genomes are drawn as lines and boxes to scale, respectively. The  
563 predicted regions that encode major functional proteins or domains are labelled with  
564 colored boxes. The filled colored circles indicate the area where their hosts were  
565 acquired, Yellow Sea (yellow), East China Sea (red), South China Sea (blue).

566

567 **Fig. 6 Possible host-sharing pattern of viruses in major invertebrate habitats. A)**  
568 The viral network indicating the unevenly distributed of host sharing. Nodes represent  
569 the class of the host groups. Node size is proportional to number of viruses collected  
570 into the analysis while node color is related to the areas where the hosts live. Edge

571 width is proportional to the putative host sharing frequency. **B)** Correlation of host  
572 sharing frequency ratio, calculated using host sharing frequency with number of  
573 viruses in each type of host in different seas. Best-fit lines with 95% confidence  
574 intervals from linear regression are plotted. The filled colored circles indicate the area  
575 where their hosts were acquired, terrestrial (bluish violet), freshwater (blue green),  
576 Yellow Sea (yellow), East China Sea (red), South China Sea (blue).

**A**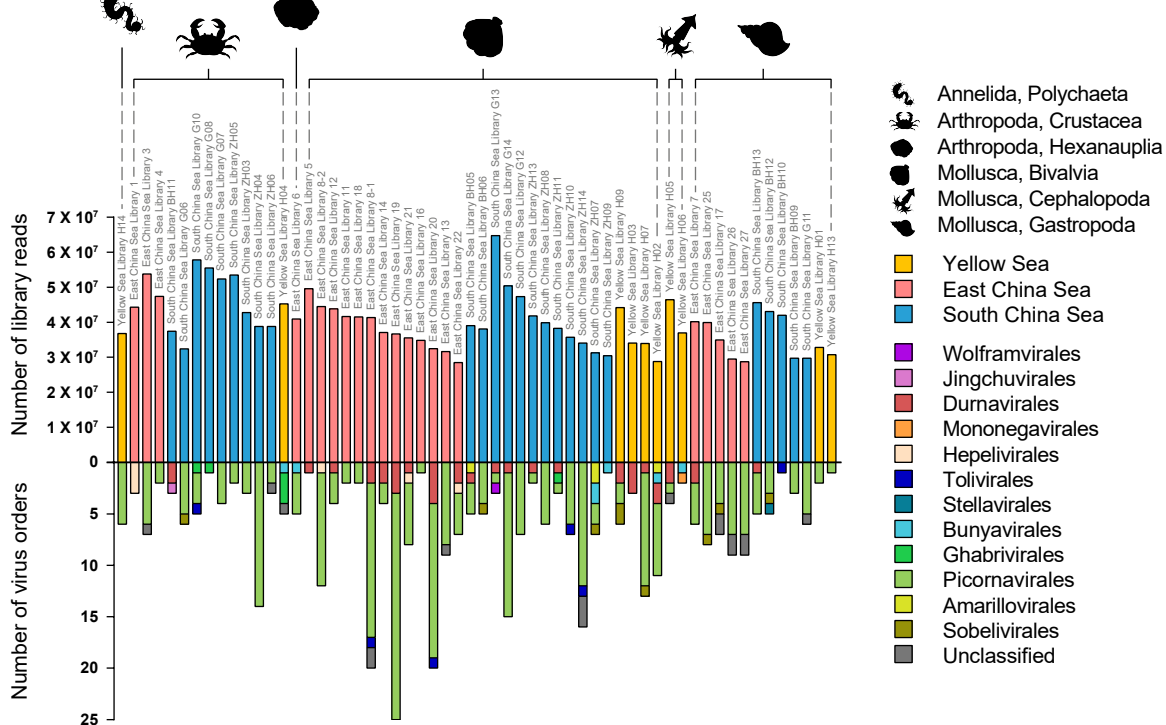**B**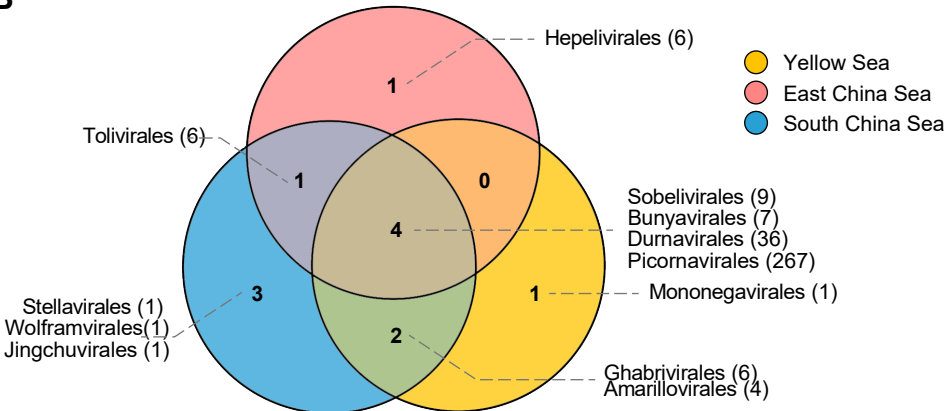

# Durnavirales

0.4

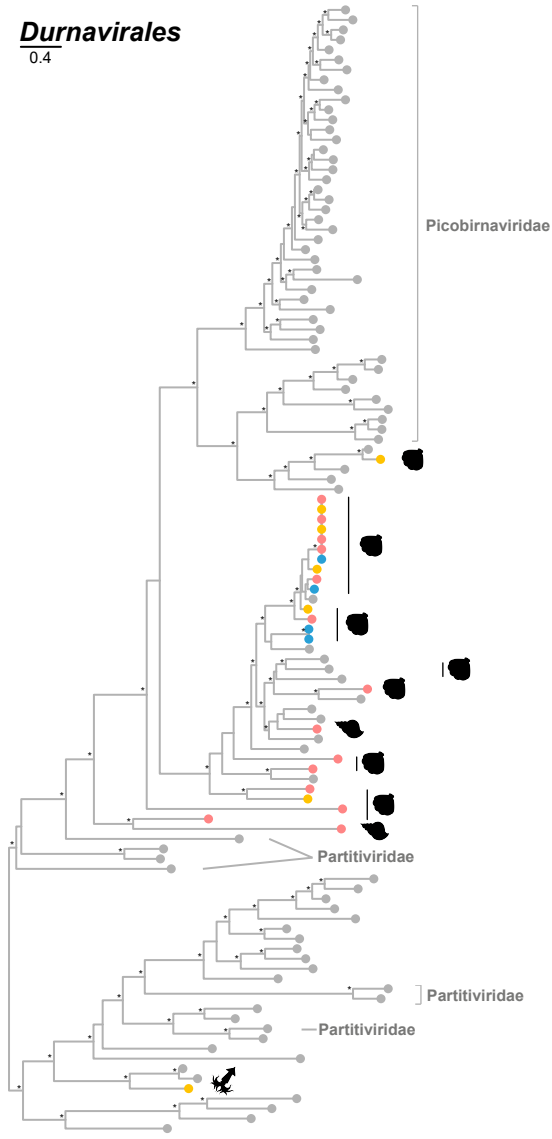

# Totiviridae

0.4

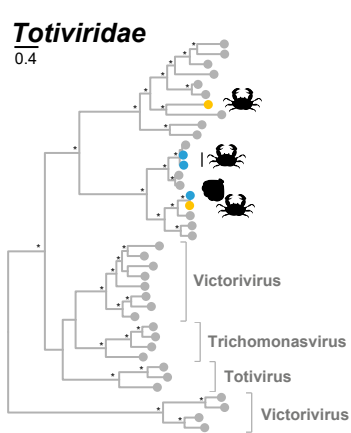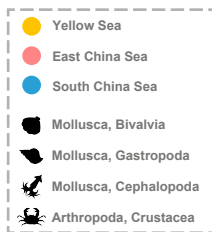

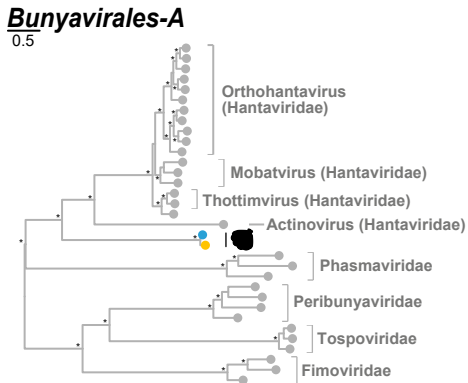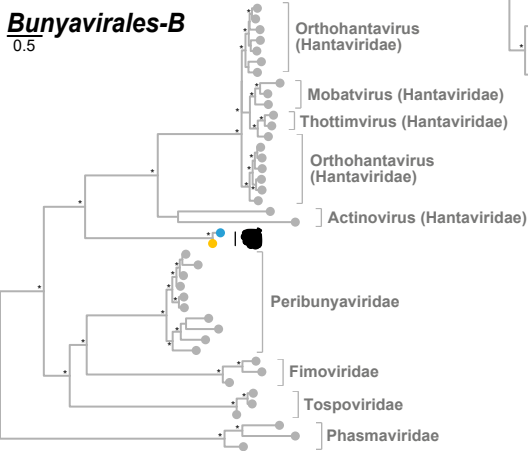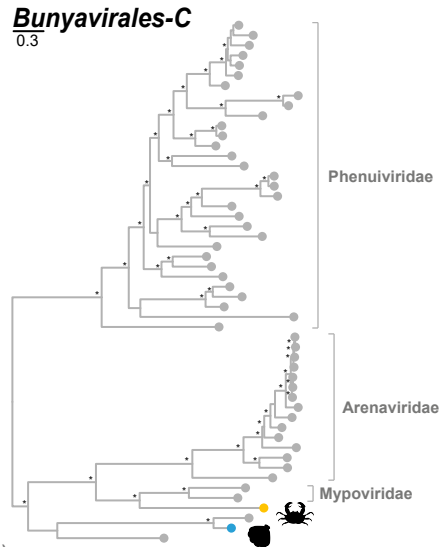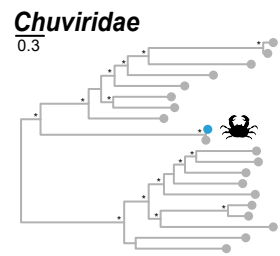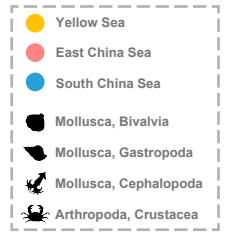



# Picornavirales

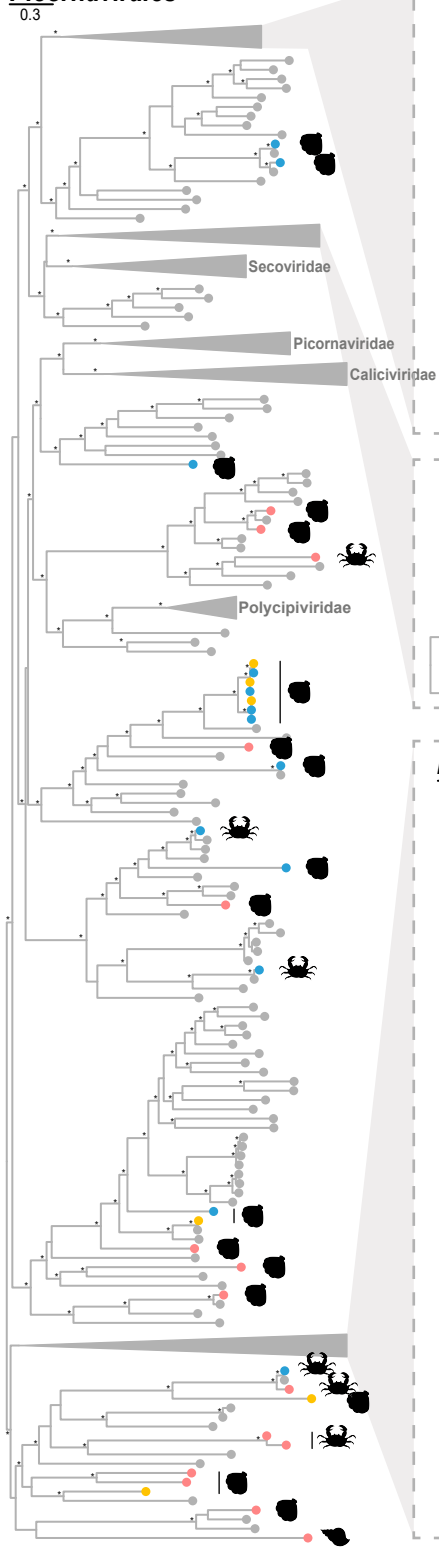

# Dicistroviridae

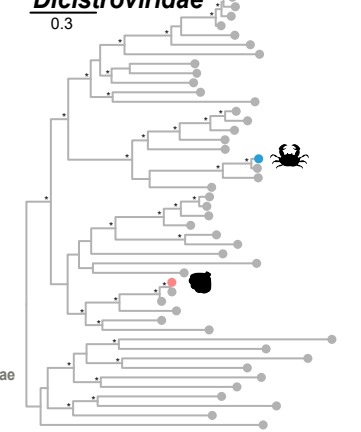

# Iflaviridae

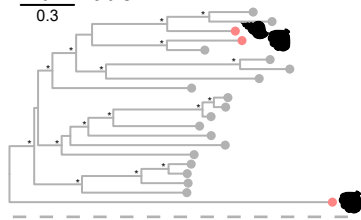

# Marnaviridae

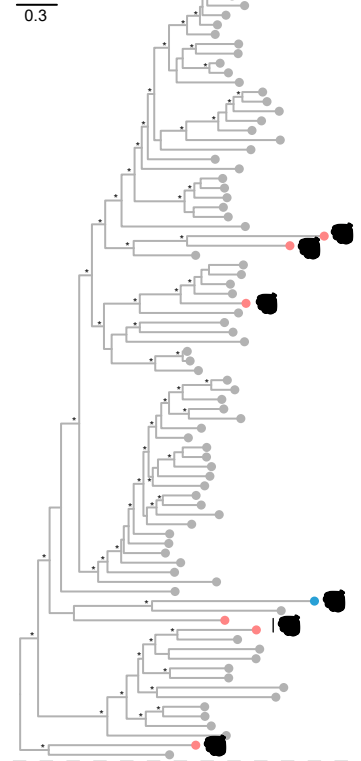

# Flaviviridae

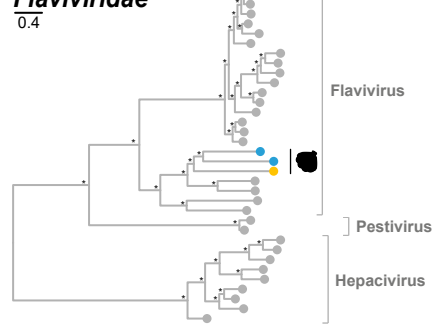

# Hepelivirales

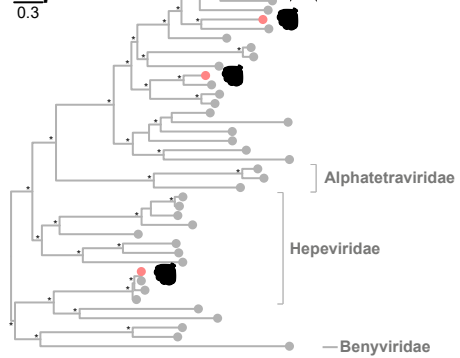

# Solemoviridae

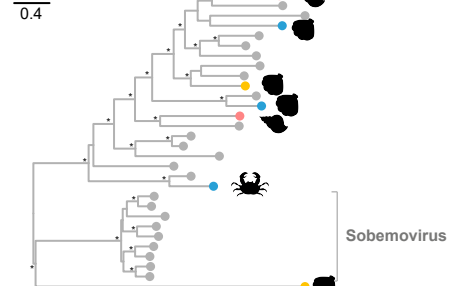

# Tombusviridae

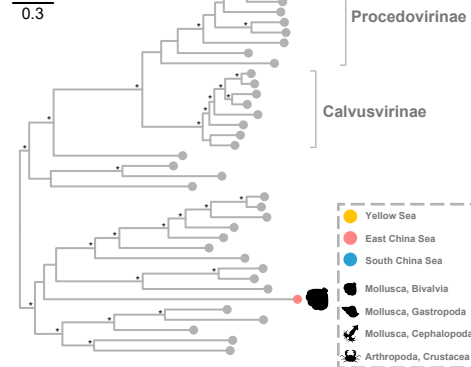

## Negative-sense RNA viruses

### *Bunyavirales*

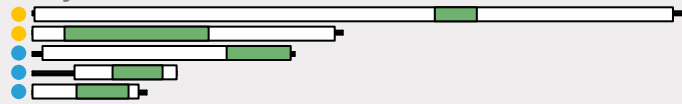

### *Chuviridae*

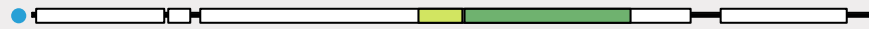

## Positive-sense RNA viruses

### *Flaviviridae*

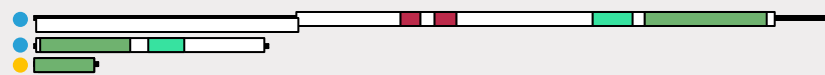

### *Picornavirales*

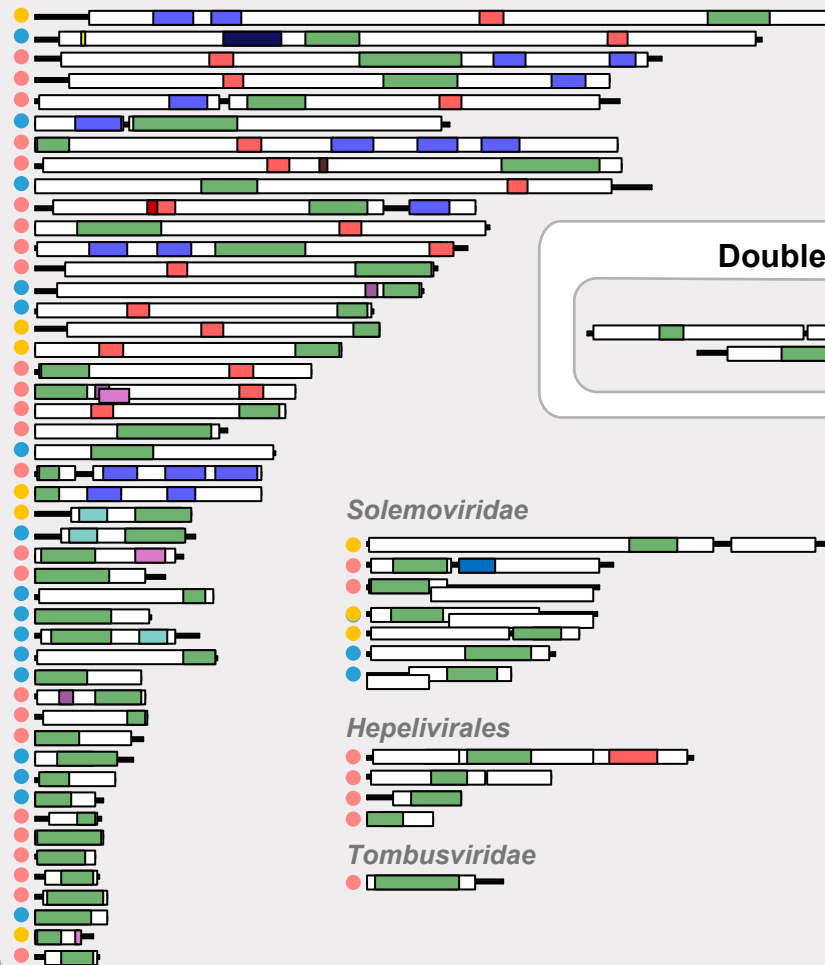

### *Solemoviridae*

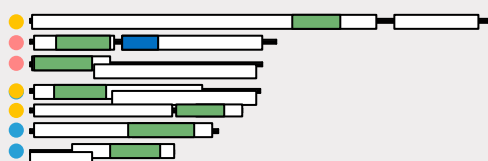

### *Hepelivirales*

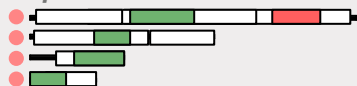

### *Tombusviridae*

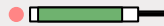

## Double-stranded RNA viruses

### *Totiviridae*

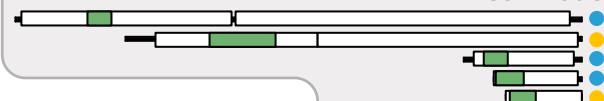

### *Durnavirales*

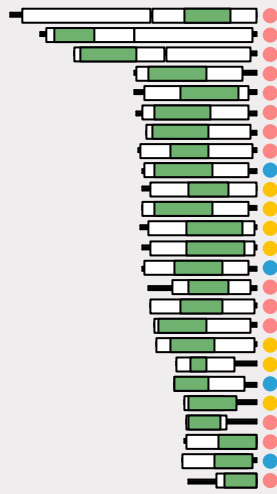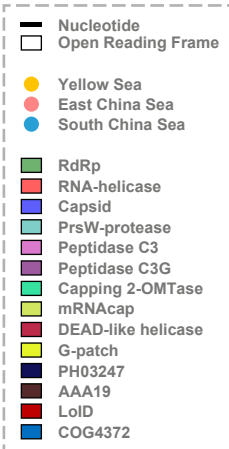

3kb

**A**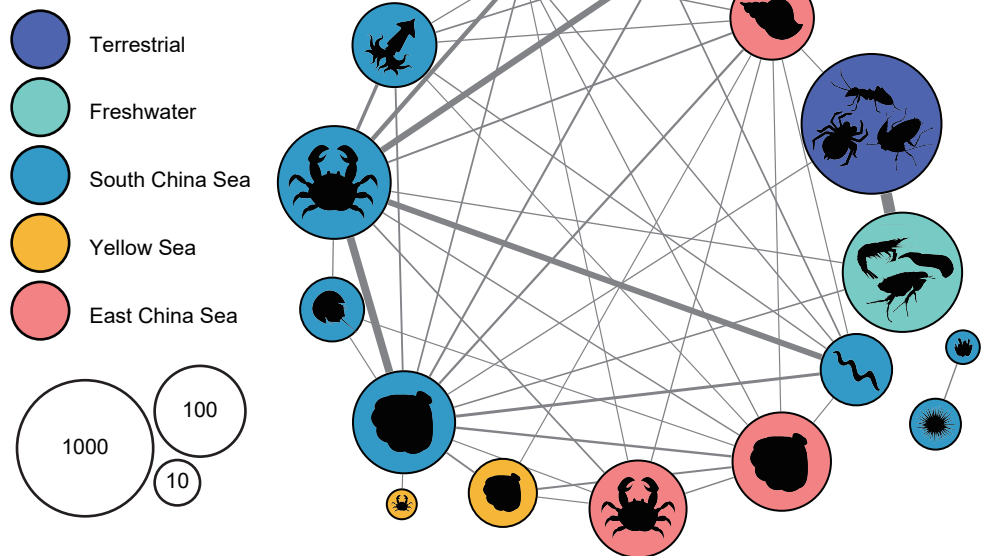**B**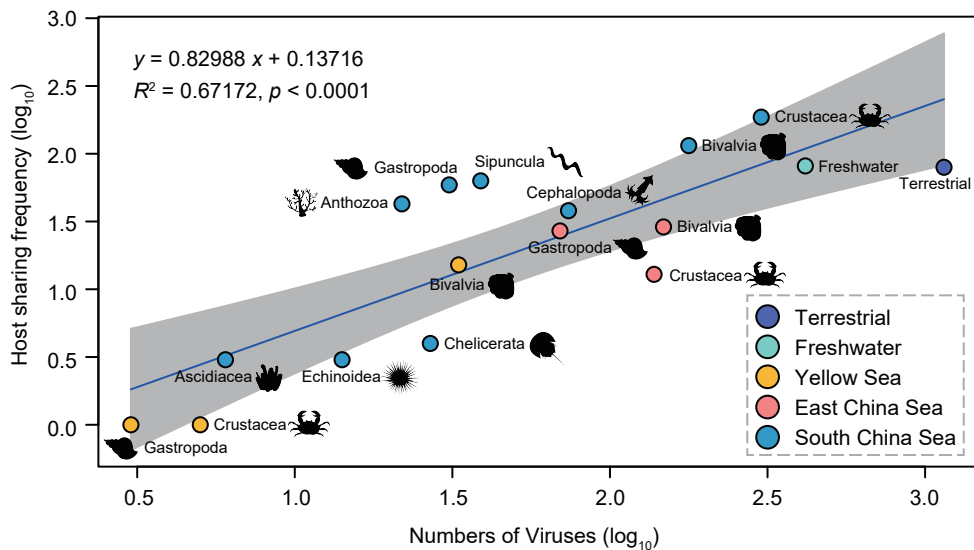

Source: https://biorxiv.org/content/10.1101/2021.04.21.440720v1.full.pdf
